# Supplementary material
Source: publisher figshare collection journal article supplement (https://acs.figshare.com/ndownloader/files/3851509)
Supplement: Supplementary file 1 [file 3851509]

# Fabrication of novel nitrogen-doped graphene–hollow AuPd nanoparticle hybrid films for the highly efficient electrocatalytic reduction of H<sub>2</sub>O<sub>2</sub>

*Lei Shang, Baizhao Zeng, Faqiong Zhao\**

Key Laboratory of Analytical Chemistry for Biology and Medicine (Ministry of  
Education), College of Chemistry and Molecular Sciences, Wuhan University, Wuhan  
430072, Hubei Province, P. R. China

## **SUPPORTING INFORMATION**

**Corresponding Author**

\* Tel: 86-27-68752701; Fax: 86-27-68754067;

\*E-mail address: fqzhao@whu.edu.cn (FQ Zhao)

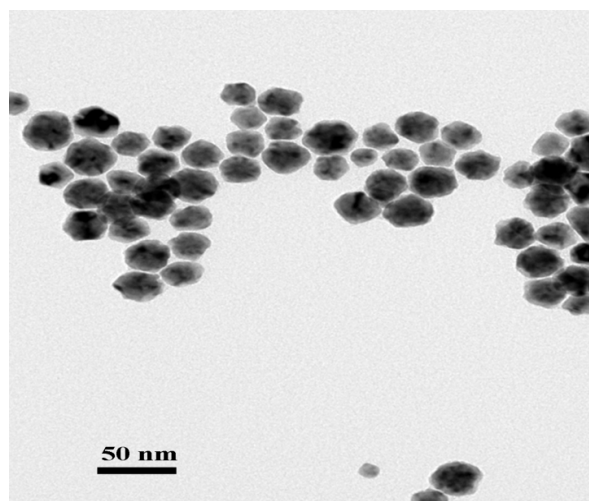

**Figure S1.** TEM of sAu<sub>1</sub>Pd<sub>4</sub> alloy nanoparticles.

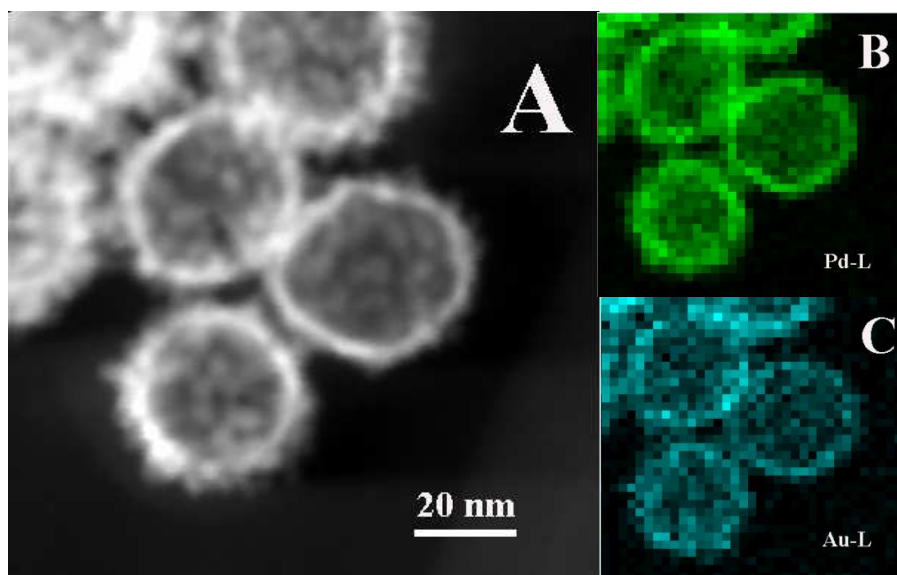

**Figure S2.** HAADF-STEM image of hAu<sub>1</sub>Pd<sub>4</sub> NPs (A), the element mapping of Pd (B) and Au (C) in hAu<sub>1</sub>Pd<sub>4</sub> NPs.

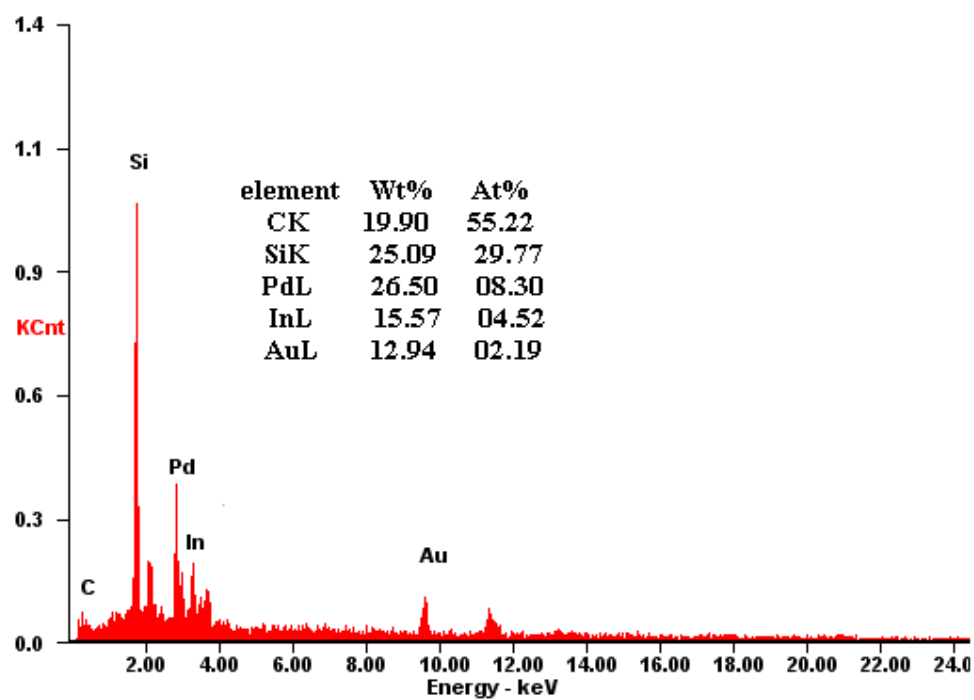

**Figure S3.** EDX of Au<sub>1</sub>Pd<sub>4</sub> alloy nanoparticles.

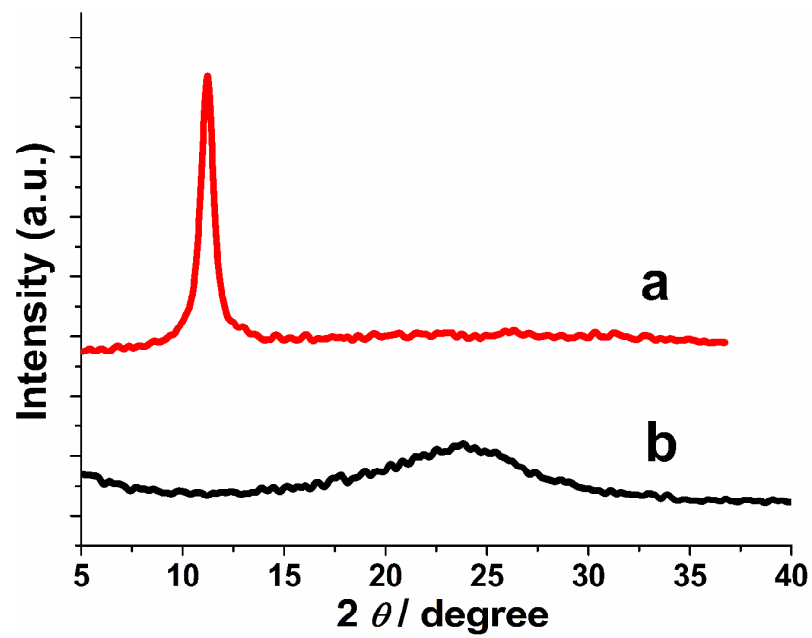

**Figure S4.** XRD patterns of GO (a) and NG (b).

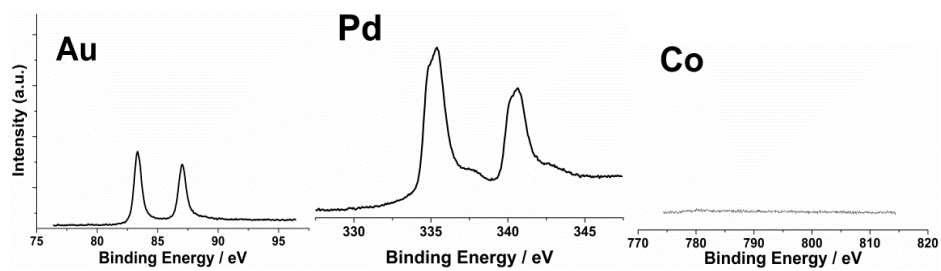

**Figure S5.** XPS spectra of Au, Pd and Co in NG-hAu1Pd4 hybrid.

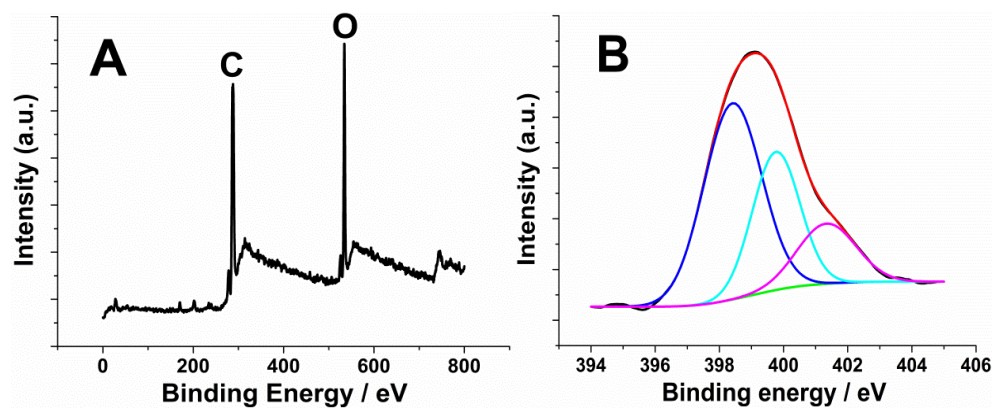

**Figure S6.** (A) XPS spectra of GO; (B) high resolution N1s spectra of NG.

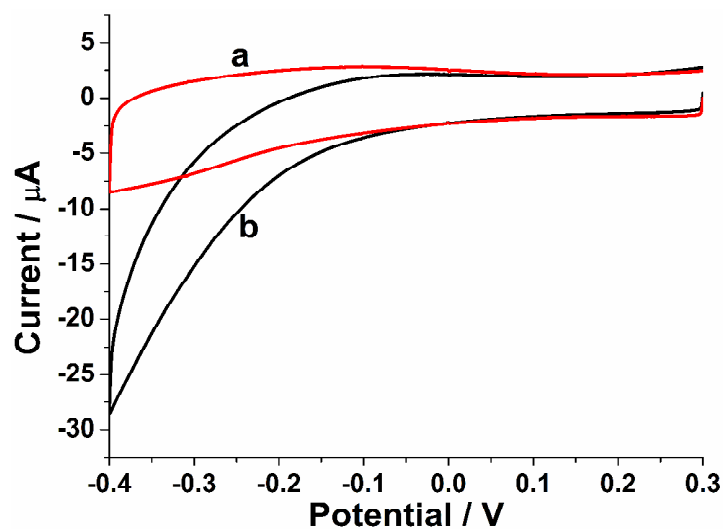

**Figure S7.** CVs of NG/GCE in 0.1 M PBS (pH 7.0) containing 0 (a) and 1 (b) mM  $\text{H}_2\text{O}_2$ .



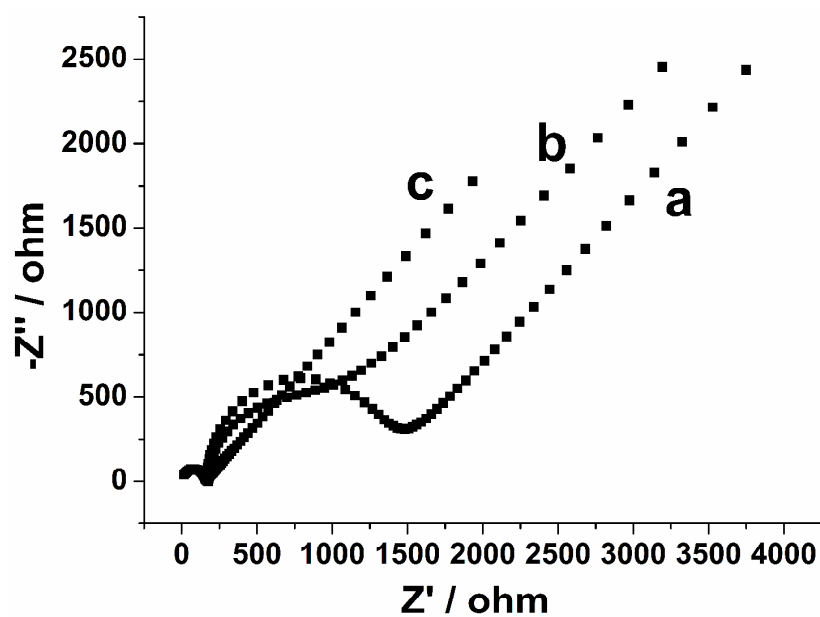

**Figure S8.** Nyquist plots of GCE (a), G/GCE (b) and NG/GCE (c). Solution composition: 0.1 M KCl containing 5.0 mM  $\text{Fe}[(\text{CN})_6]^{3-/4-}$  (1:1).

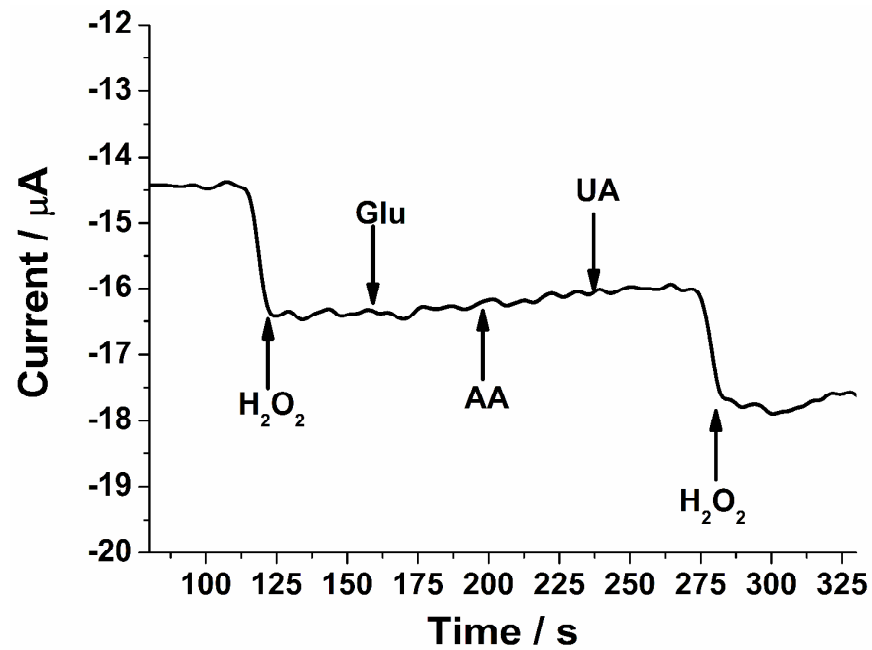

**Figure S9.** Anti-interference test via chronoamperometry by adding 50  $\mu\text{M}$  glucose (Glu), 5  $\mu\text{M}$  AA, 5  $\mu\text{M}$  UA and 5  $\mu\text{M}$   $\text{H}_2\text{O}_2$  in 0.1 M PBS (pH = 7.0) under stirring.

**Table S1** Comparison of different electrodes for H<sub>2</sub>O<sub>2</sub> determination.

| Catalyst                            | Linear range<br>(mM)        | Sensitivity<br>( $\mu\text{A mM}^{-1} \text{cm}^{-2}$ ) | LOD<br>( $\mu\text{M}$ ) | Reference |
|-------------------------------------|-----------------------------|---------------------------------------------------------|--------------------------|-----------|
| PtPd/MWCNT                          | $2.0 \times 10^{-3}$ -0.125 | 414.8                                                   | 1.2                      | 1         |
| Pd/PEDOT                            | $2.5 \times 10^{-3}$ -1.0   | 215.3                                                   | 2.84                     | 3         |
| Pd/mesoporous<br>carbon nanospheres | $7.5 \times 10^{-3}$ -10    | 307.5                                                   | 1                        | 6         |
| PtPd/graphite                       | 0-0.5                       | 1443.7                                                  | -                        | 7         |
| Pd/Au nanowire                      | 0-2                         | 530                                                     | 5                        | 33        |
| NG-hAu1Pd4                          | $1 \times 10^{-4}$ -0.02    | 5095.5                                                  | 0.02                     | This work |
